# Supplementary figures and images for: Insight into the prebiotic concept: lessons from an exploratory, double blind intervention study with inulin-type fructans in obese women
Source: PubMed Central journal article supplement — Gut. 2012 Nov 7;62(8):1112–21. doi: 10.1136/gutjnl-2012-303304 (PMC3711491; doi:10.1136/gutjnl-2012-303304), 2012-11-07

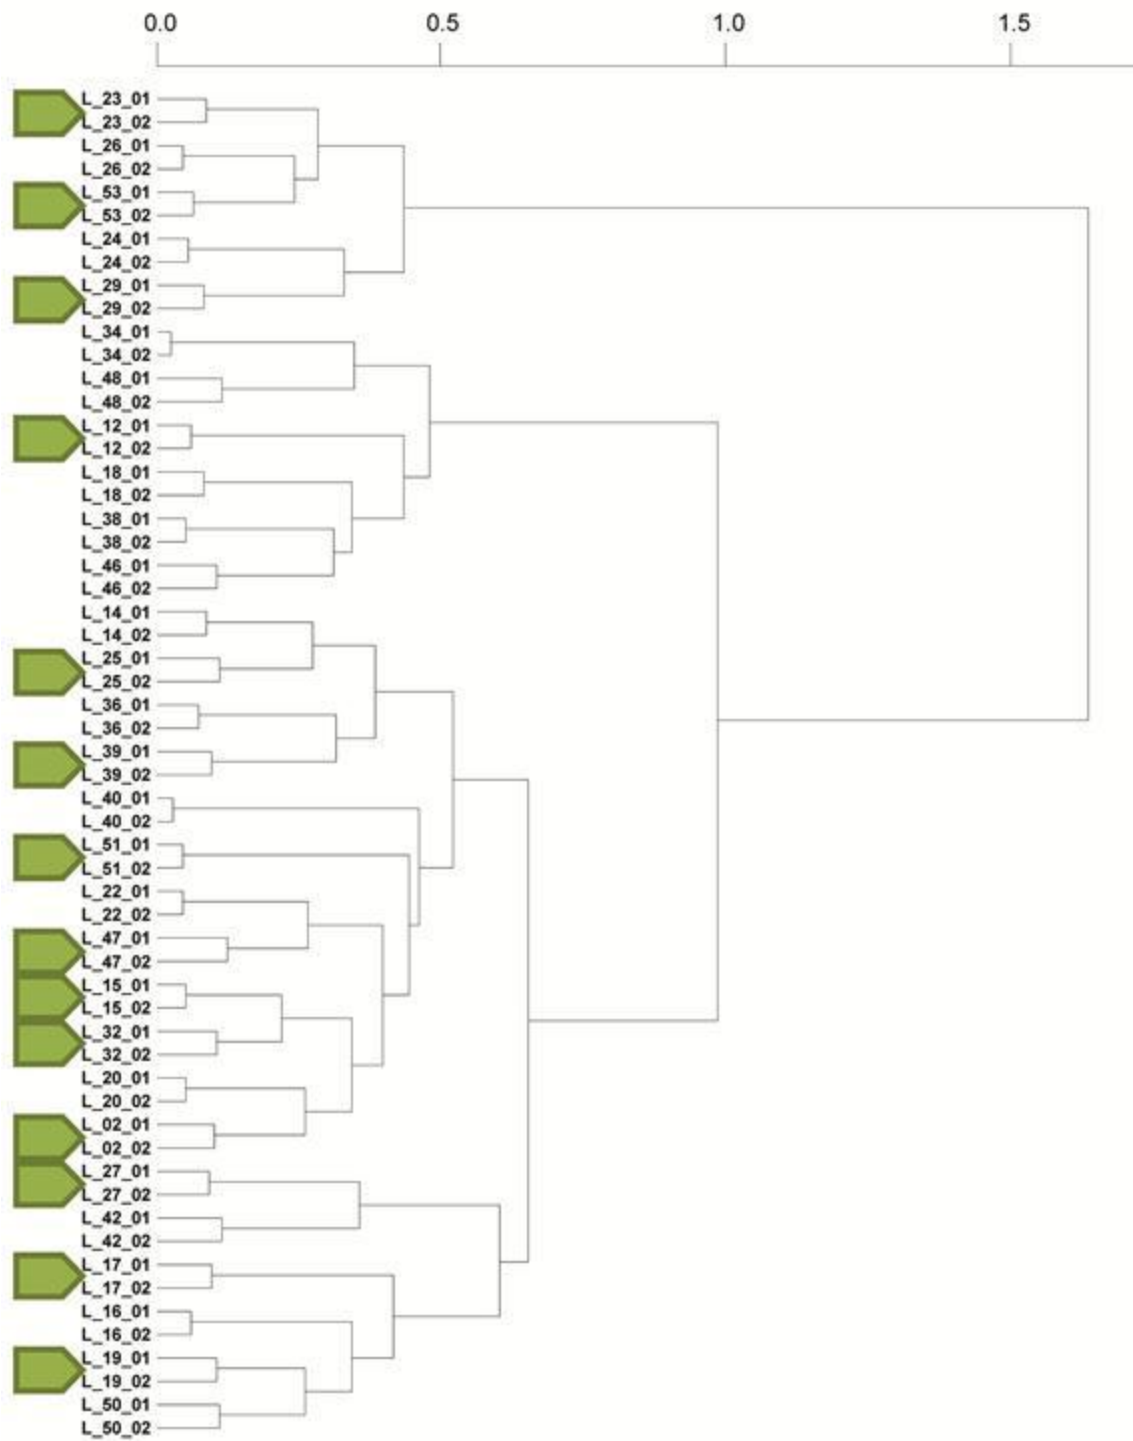

Supplement: gutjnl-2012-303304-s2.pdf [file gutjnl-2012-303304-s2.pdf]

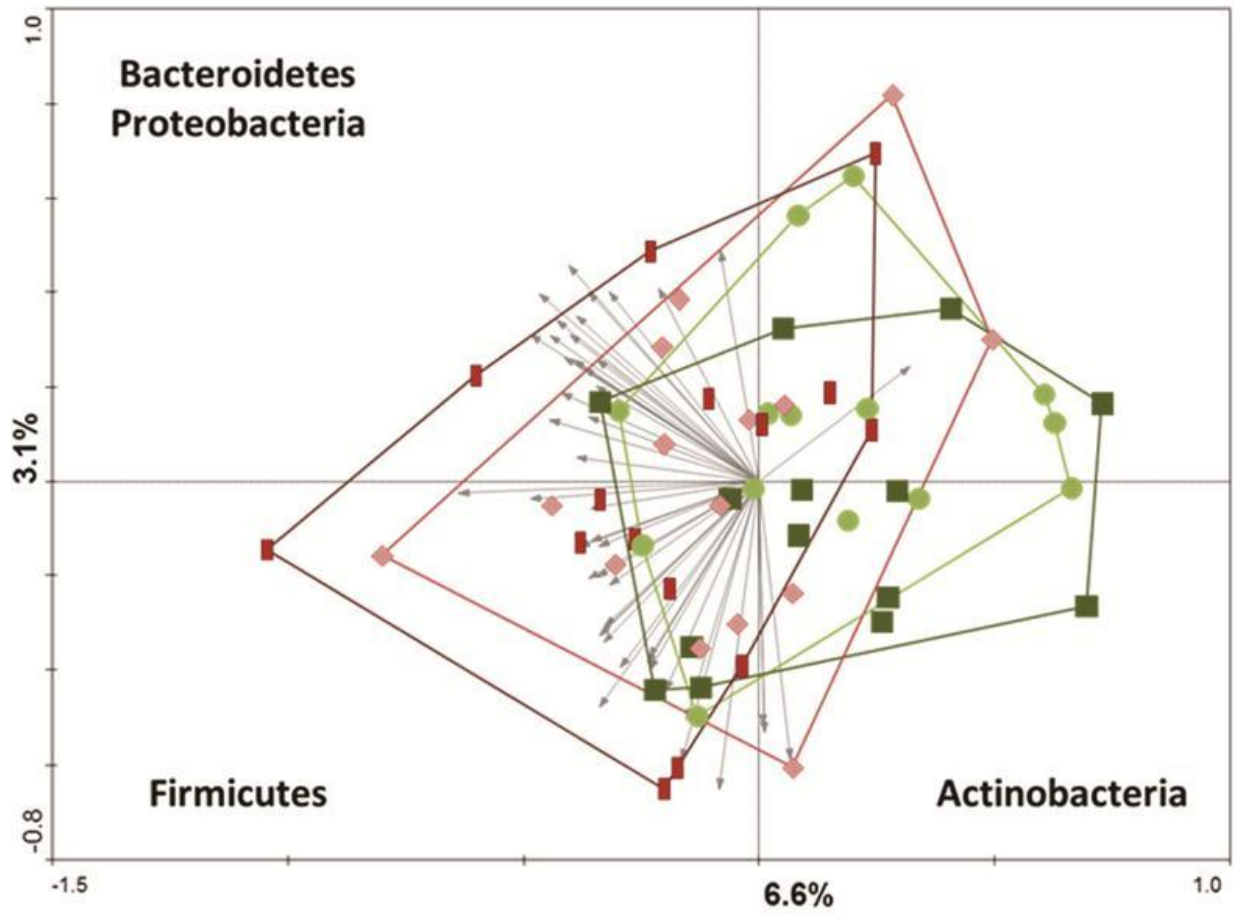

Supplement: gutjnl-2012-303304-s3.pdf [file gutjnl-2012-303304-s3.pdf]
