# Supplementary figures and images for: Insight into the prebiotic concept: lessons from an exploratory, double blind intervention study with inulin-type fructans in obese women
Source: HighWire-hosted journal article supplement (doi:10.1136/gutjnl-2012-303304), 2012-11-07

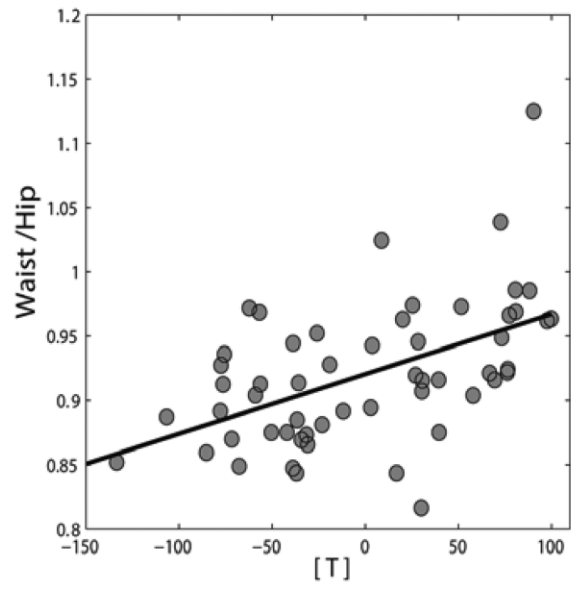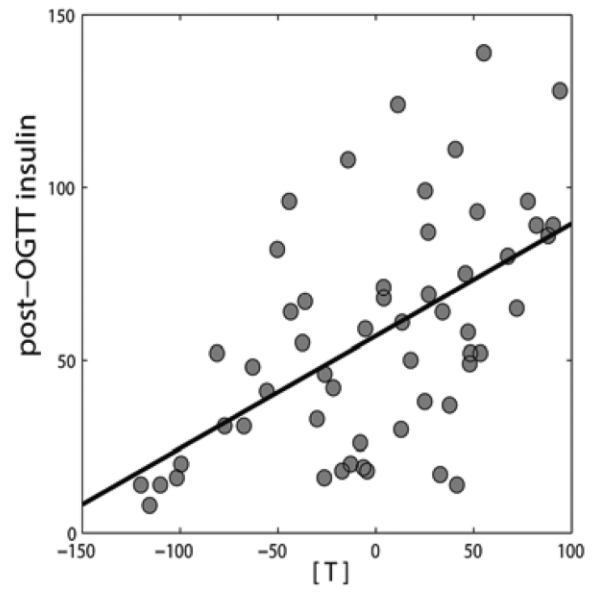

Supplement: gutjnl-2012-303304supp_figure3.pdf [file gutjnl-2012-303304supp_figure3.pdf]
